# Supplementary material for: Hemispheric Asymmetries in Resting-State Connectivity: Insights from Healthy Controls and Implications for Neurological Disorders
Source: Research Square preprint supplement (doi:10.21203/rs.3.rs-7233697/v1), 2025-08-18
Supplement: Supplementary file 3 [file 880fe0de85d7ad0e5138097f.docx]

| **Region** | **Metric** | **P-Values** | **Effect Sizes** |
| --- | --- | --- | --- |
| Insular Cortex | LE | 0.027 | -0.245 |
| Middle Frontal Gyrus | LE | 0.015 | 0.270 |
| Middle Frontal Gyrus | CC | 0.028 | 0.242 |
| Inferior Frontal Gyrus; pars triangularis | GE | 0.032 | -0.236 |
| Inferior Frontal Gyrus; pars triangularis | APL | 0.020 | 0.256 |
| Inferior Frontal Gyrus; pars opercularis | GE | 0.049 | -0.217 |
| Inferior Frontal Gyrus; pars opercularis | LE | 0.004 | 0.319 |
| Inferior Frontal Gyrus; pars opercularis | BC | 0.004 | -0.321 |
| Inferior Frontal Gyrus; pars opercularis | Cost and Degree | 0.044 | -0.222 |
| Inferior Frontal Gyrus; pars opercularis | CC | 0.003 | 0.335 |
| Middle Temporal Gyrus; posterior division | GE | 0.041 | -0.225 |
| Middle Temporal Gyrus; posterior division | APL | 0.037 | 0.230 |
| Postcentral Gyrus | GE | 0.012 | 0.279 |
| Postcentral Gyrus | LE | 0.027 | -0.244 |
| Postcentral Gyrus | Cost and Degree | 0.010 | 0.286 |
| Postcentral Gyrus | APL | 0.030 | -0.240 |
| Postcentral Gyrus | CC | 0.019 | -0.259 |
| Supramarginal Gyrus; anterior division | Cost and Degree | 0.050 | -0.216 |
| Supramarginal Gyrus; posterior division | BC | 0.019 | -0.259 |
| Lateral Occipital Cortex; superior division | GE | 0.041 | 0.225 |
| Lateral Occipital Cortex; superior division | Cost and Degree | 0.045 | 0.221 |
| Lateral Occipital Cortex; inferior division | GE | 0.022 | 0.253 |
| Lateral Occipital Cortex; inferior division | APL | 0.021 | -0.254 |
| Juxtapositional Lobule Cortex -formerly Supplementary Motor Cortex- | GE | 0.002 | -0.341 |
| Juxtapositional Lobule Cortex -formerly Supplementary Motor Cortex- | Cost and Degree | 0.000 | -0.424 |
| Juxtapositional Lobule Cortex -formerly Supplementary Motor Cortex- | APL | 0.013 | 0.274 |
| Paracingulate Gyrus | GE | 0.045 | -0.220 |
| Paracingulate Gyrus | LE | 0.035 | 0.233 |
| Paracingulate Gyrus | BC | 0.019 | -0.260 |
| Paracingulate Gyrus | APL | 0.012 | 0.277 |
| Paracingulate Gyrus | CC | 0.019 | 0.260 |
| Temporal Fusiform Cortex; posterior division | BC | 0.007 | 0.298 |
| Temporal Fusiform Cortex; posterior division | Cost and Degree | 0.020 | 0.258 |
| Central Opercular Cortex | LE | 0.022 | -0.253 |
| Central Opercular Cortex | BC | 0.001 | 0.361 |
| Central Opercular Cortex | CC | 0.036 | -0.232 |
| Parietal Operculum Cortex | LE | 0.037 | -0.230 |
| Parietal Operculum Cortex | APL | 0.036 | -0.232 |
| Parietal Operculum Cortex | CC | 0.043 | -0.223 |
| Heschl's Gyrus | GE | 0.007 | 0.300 |
| Heschl's Gyrus | Cost and Degree | 0.006 | 0.309 |
| Heschl's Gyrus | APL | 0.011 | -0.281 |
| Cerebelum Crus1 | LE | 0.016 | -0.268 |
| Cerebelum Crus1 | APL | 0.046 | -0.220 |
| Cerebelum Crus1 | CC | 0.017 | -0.264 |
| Cerebelum 4 5 | GE | 0.036 | 0.231 |
| Cerebelum 4 5 | Cost and Degree | 0.001 | 0.358 |

Supplementary Table 5. Regions where the graph-based Laterality Index was significantly different from zero correction in the ADNI dataset.

Abbreviations: GE: Global Efficiency, APL: Average Path Length, LE: Local Efficiency, CC: Clustering Coefficient, BC: Betweenness Centrality
