# Supplementary material for: Hemispheric Asymmetries in Resting-State Connectivity: Insights from Healthy Controls and Implications for Neurological Disorders
Source: Research Square preprint supplement (doi:10.21203/rs.3.rs-7233697/v1), 2025-08-18
Supplement: Supplementary file 5 [file fe23557436bbca262b4db7e5.docx]

| **Region** | **Metric** | **P-Values** | **Effect Sizes** |
| --- | --- | --- | --- |
| Insular Cortex | LE | 0.013 | -0.318 |
| Insular Cortex | BC | 0.024 | 0.288 |
| Insular Cortex | CC | 0.010 | -0.328 |
| Superior Frontal Gyrus | Cost and Degree | 0.018 | 0.302 |
| Inferior Frontal Gyrus; pars triangularis | GE | 0.044 | -0.255 |
| Precentral Gyrus | LE | 0.014 | -0.312 |
| Precentral Gyrus | BC | 0.044 | 0.255 |
| Precentral Gyrus | CC | 0.012 | -0.322 |
| Inferior Temporal Gyrus; posterior division | GE | 0.037 | 0.265 |
| Inferior Temporal Gyrus; posterior division | BC | 0.037 | 0.264 |
| Inferior Temporal Gyrus; posterior division | Cost and Degree | 0.002 | 0.399 |
| Postcentral Gyrus | GE | 0.003 | 0.390 |
| Postcentral Gyrus | Cost and Degree | 0.002 | 0.405 |
| Postcentral Gyrus | GE | 0.012 | -0.322 |
| Supramarginal Gyrus; anterior division | LE | 0.002 | -0.409 |
| Supramarginal Gyrus; anterior division | Cost and Degree | 0.041 | -0.258 |
| Supramarginal Gyrus; anterior division | CC | 0.007 | -0.348 |
| Supramarginal Gyrus; posterior division | LE | 0.021 | -0.294 |
| Supramarginal Gyrus; posterior division | CC | 0.020 | -0.297 |
| Angular Gyrus | GE | 0.043 | 0.256 |
| Angular Gyrus | GE | 0.022 | -0.290 |
| Lateral Occipital Cortex; superior division | GE | 0.009 | 0.333 |
| Lateral Occipital Cortex; superior division | Cost and Degree | 0.005 | 0.363 |
| Lateral Occipital Cortex; superior division | GE | 0.035 | -0.267 |
| Lateral Occipital Cortex; inferior division | GE | 0.006 | 0.354 |
| Lateral Occipital Cortex; inferior division | Cost and Degree | 0.007 | 0.345 |
| Lateral Occipital Cortex; inferior division | GE | 0.011 | -0.326 |
| Intracalcarine Cortex | GE | 0.032 | -0.272 |
| Intracalcarine Cortex | Cost and Degree | 0.027 | -0.280 |
| Juxtapositional Lobule Cortex -formerly Supplementary Motor Cortex- | GE | 0.015 | -0.310 |
| Juxtapositional Lobule Cortex -formerly Supplementary Motor Cortex- | Cost and Degree | 0.001 | -0.416 |
| Frontal Orbital Cortex | GE | 0.017 | 0.303 |
| Frontal Orbital Cortex | Cost and Degree | 0.023 | 0.289 |
| Frontal Orbital Cortex | GE | 0.018 | -0.300 |
| Parahippocampal Gyrus; anterior division | LE | 0.030 | -0.276 |
| Central Opercular Cortex | GE | 0.001 | 0.450 |
| Central Opercular Cortex | LE | 0.002 | -0.393 |
| Central Opercular Cortex | BC | 0.001 | 0.420 |
| Central Opercular Cortex | Cost and Degree | 0.000 | 0.503 |
| Central Opercular Cortex | GE | 0.002 | -0.393 |
| Central Opercular Cortex | CC | 0.001 | -0.416 |
| Parietal Operculum Cortex | GE | 0.047 | 0.251 |
| Parietal Operculum Cortex | GE | 0.018 | -0.302 |
| Parietal Operculum Cortex | CC | 0.017 | -0.304 |
| Supracalcarine Cortex | GE | 0.001 | -0.440 |
| Supracalcarine Cortex | Cost and Degree | 0.003 | -0.380 |
| Supracalcarine Cortex | GE | 0.000 | 0.461 |
| Occipital Pole | GE | 0.046 | 0.253 |
| Cerebelum Crus1 | GE | 0.004 | 0.369 |
| Cerebelum Crus1 | LE | 0.005 | -0.359 |
| Cerebelum Crus1 | BC | 0.002 | 0.411 |
| Cerebelum Crus1 | Cost and Degree | 0.025 | 0.285 |
| Cerebelum Crus1 | GE | 0.001 | -0.414 |
| Cerebelum Crus1 | CC | 0.006 | -0.351 |
| Cerebelum 4 5 | GE | 0.008 | 0.337 |
| Cerebelum 4 5 | BC | 0.007 | 0.348 |
| Cerebelum 4 5 | Cost and Degree | 0.004 | 0.373 |
| Cerebelum 4 5 | GE | 0.017 | -0.303 |
| Cerebelum 6 | GE | 0.000 | 0.591 |
| Cerebelum 6 | BC | 0.001 | 0.429 |
| Cerebelum 6 | Cost and Degree | 0.000 | 0.631 |
| Cerebelum 6 | GE | 0.000 | -0.506 |
| Cerebelum 9 | GE | 0.018 | 0.301 |
| Cerebelum 9 | GE | 0.007 | -0.344 |

*Supplementary Table 4. Regions where the graph-based Laterality Index was significantly different from zero correction in the Local dataset.*

Abbreviations: GE: Global Efficiency, APL: Average Path Length, LE: Local Efficiency, CC: Clustering Coefficient, BC: Betweenness Centrality
